# Supplementary material for: Emc3 maintains intestinal homeostasis by preserving secretory lineages
Source: PubMed Central journal article supplement (PMC8222001; doi:10.1038/s41385-021-00399-2), 2021-03-30
Supplement: 41385_2021_399_MOESM1_ESM.pdf [file 41385_2021_399_MOESM1_ESM.pdf]

1 **Supplementary Information**

2

3 **Emc3 maintains intestinal homeostasis by**  
4 **preserving secretory lineages**

5

6 **Huang et al.**

7

8

9

10 **Supplementary Figure 1-5**

11 **Supplementary Table 1**

12

13

## Supplementary Figure 1

14

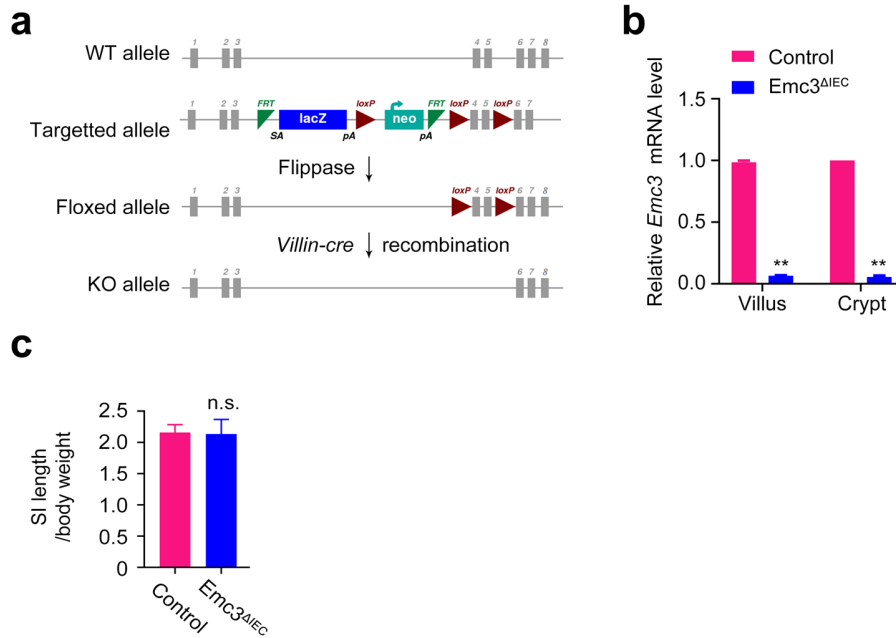

15

16

### 17 **Supplementary Figure 1 | Generation of *Emc3* conditional knockout mice.**

18 **(a)** Experimental scheme of gene targeting strategy for *Emc3*.

19 **(b)** Expression of *Emc3* in villus and crypt examined by qPCR. n=3 for each genotype. Statistical data  
20 represent mean ± SEM. Student's t-test: \*\*p < 0.01.

21 **(c)** Length of small intestine (cm) versus body weight (g). n=3 for each genotype. Statistical data  
22 represent mean ± SEM. Student's t-test: n.s. not significant.

23

24

## Supplementary Figure 2

25

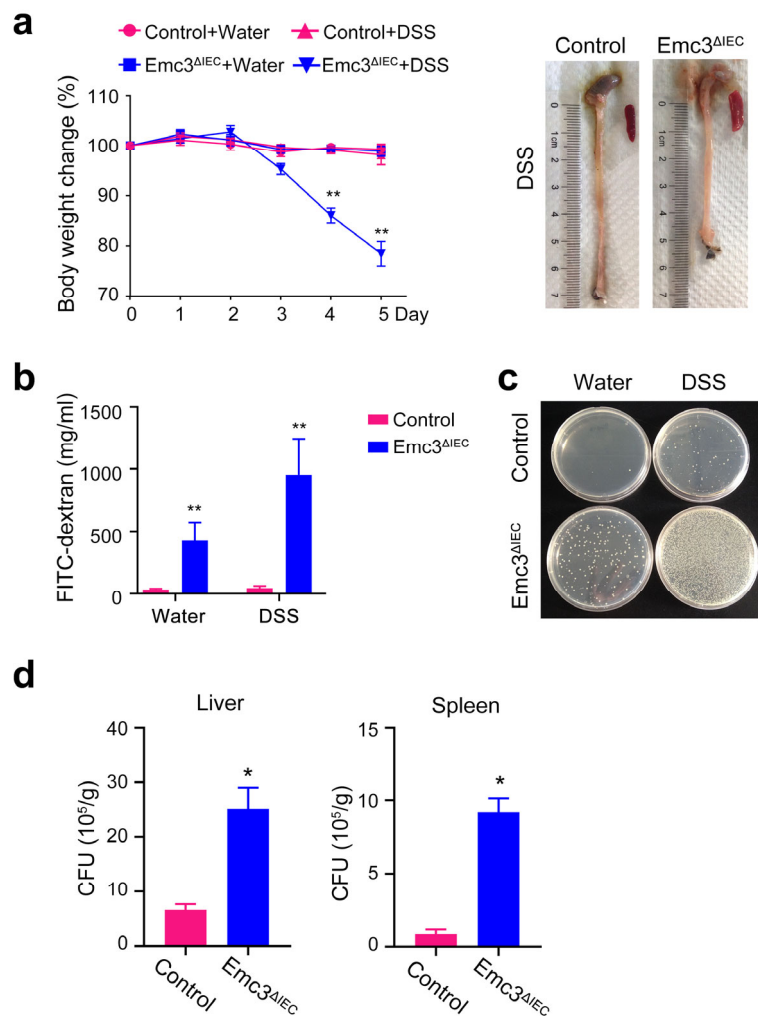

26

27

### 28 **Supplementary Figure 2 | Emc3 is required to protect mice from colitis.**

29 **(a)** Body weight change and representative images of DSS treated colon. n=7 for each group.  
30 Wilcoxon's rank sum test: \*\*p < 0.01.

31 **(b-c)** Epithelium permeability shown by serum levels of FITC-dextran **(b)** and bacterial colonies in  
32 mesenteric lymph nodes **(c)**. n=3 for each group. Statistical data represent mean ± SEM. Student's t-test:  
33 \*\*p < 0.01.

34 **(d)** Counting of cultured bacteria in liver and spleen lysate 48 hr after *S. Tm* infection. n=3 for each  
35 genotype. Statistical data represent mean ± SEM. Student's t-test: \*p<0.05.

36

### Supplementary Figure 3

37

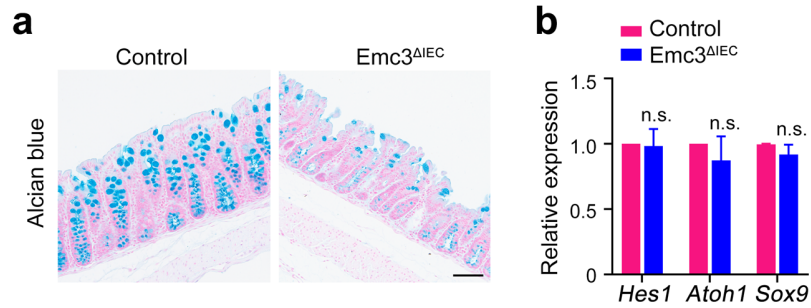

38

39

#### 40 **Supplementary Figure 3 | Depletion of goblet cells in *Emc3*<sup>ΔIEC</sup> mice.**

41 **(a)** Representative images of AB-stained goblet cells in colonic sections. Scale bar, 50  $\mu$ m.

42 **(b)** Relative expression of enterocyte progenitor cell marker (*Hes1*) and secretory progenitor cell marker  
43 (*Atoh1*) and Paneth regulator (*Sox9*). n=3 for each genotype. Statistical data represent mean  $\pm$  SEM.

44 Student's t-test: n.s. not significant.

45

## Supplementary Figure 4

46

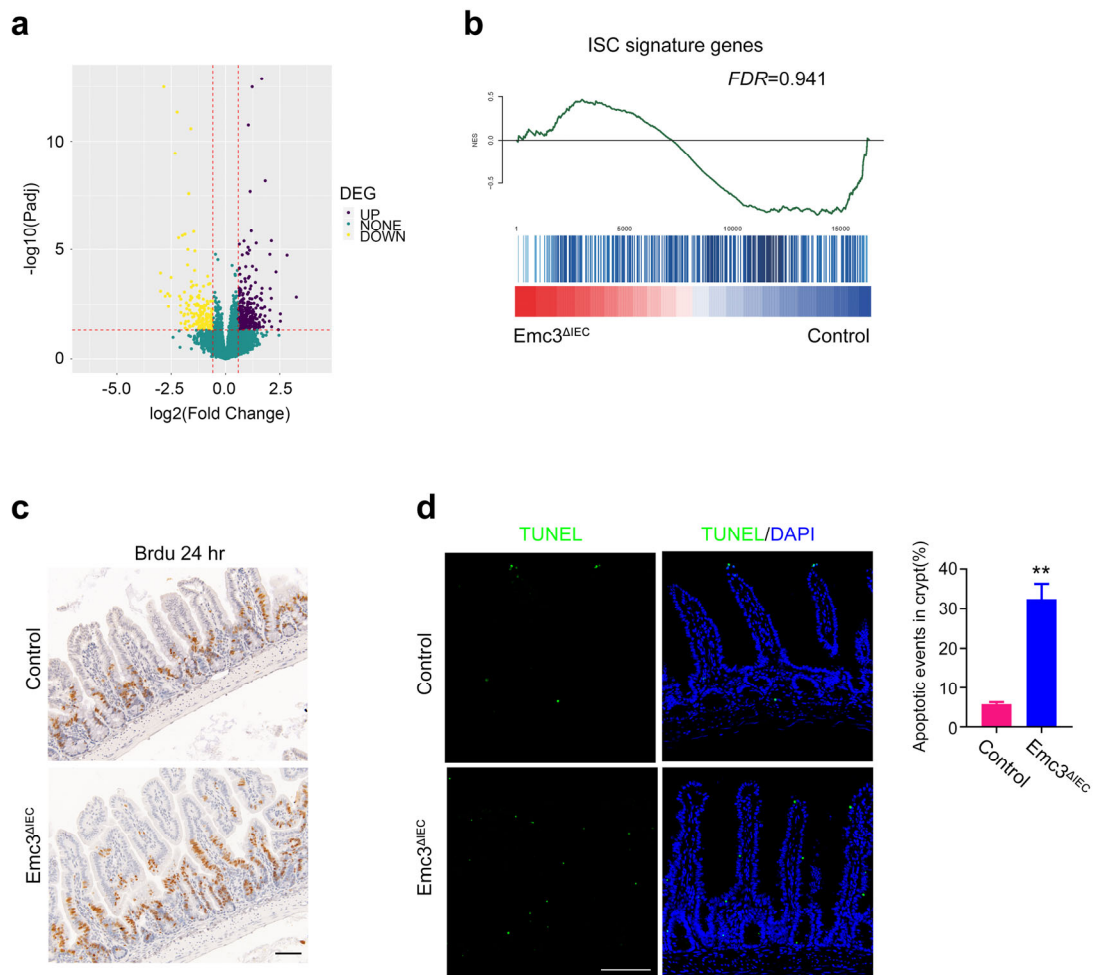

47

48

49 **Supplementary Figure 4 | Intestinal stem cells are not impaired in *Emc3<sup>AIEC</sup>* mice.**

50 **(a)** Volcano plot displaying the averaged  $\log_2$  fold change for RNA-seq data of control and *Emc3<sup>AIEC</sup>*

51 crypts.

52 **(b)** GSEA of ISC signature genes in *Emc3<sup>AIEC</sup>* versus control crypts.

53 **(c)** BrdU incorporation (24 hr after injection) assay. Scale bar, 50  $\mu\text{m}$ .

54 **(d)** Apoptosis in ileal sections determined by TUNEL analysis.  $n=3$  for each genotype. Statistical data

55 represent mean  $\pm$  SEM. Student's t-test: \*\* $p < 0.01$ . Scale bar, 50  $\mu\text{m}$ .

56

57

### Supplementary Figure 5

58

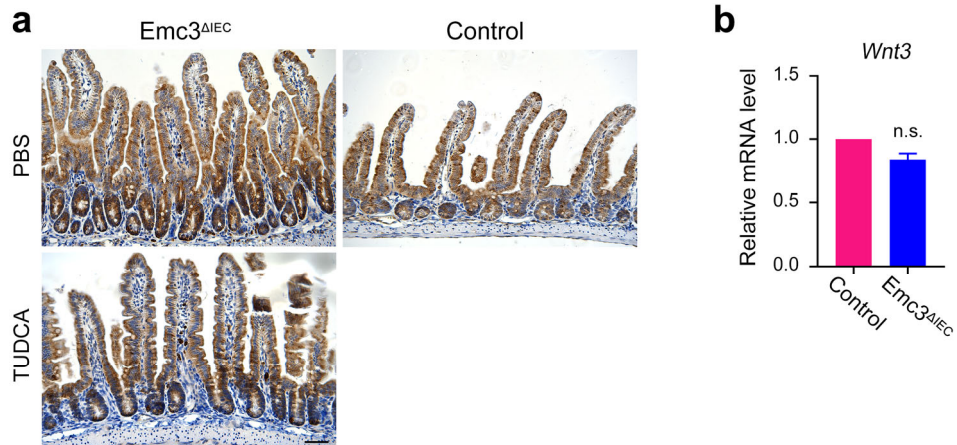

59

60

### 61 **Supplementary Figure 5 | TUDCA alleviates ER stress in *Emc3*<sup>ΔIEC</sup> mice.**

62 **(a)** Immunostaining for Bip protein. Scale bar, 50  $\mu$ m.

63 **(b)** Quantification of *Wnt3* expression from TUDCA administered mice. n=3 for each genotype.

64 Statistical data represent mean  $\pm$  SEM. Student's t-test: n.s. not significant.

65

66

67

## Supplementary Figure 6

68

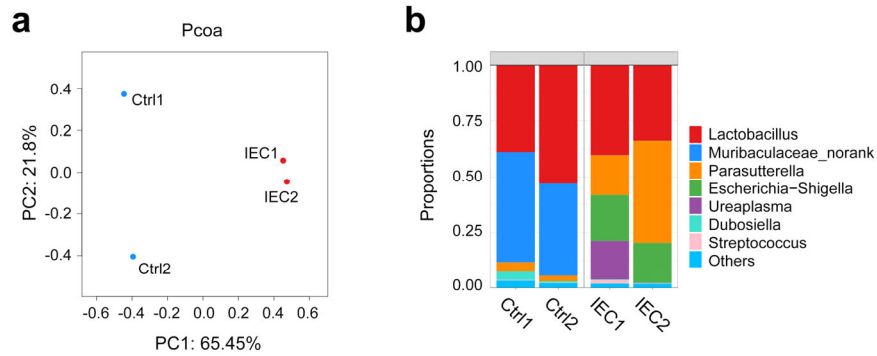

69

70

### 71 **Supplementary Figure 6 | Alteration of microbiota composition in *Emc3<sup>AIEC</sup>*.**

72 **(a)** PCoA analysis of ileal luminal microbiota from separately housed adult *Emc3<sup>AIEC</sup>* and control  
73 littermates. n=2 for each genotype.

74 **(b)** Composition of ileal luminal microbiota at genus level.

**Supplementary Table 1 | Primers for RT-qPCR.**

|                  |                          |                          |
|------------------|--------------------------|--------------------------|
| <i>Emc3</i>      | GTCCTGCCCATCGTTATCAT     | ATTTCCCTGAGGACTCTGC      |
| <i>Atoh1</i>     | GAGTGGGCTGAGGTAAGAGAGT   | GGTCGGTGCTATCCAGGAG      |
| <i>Gfi1</i>      | AGAAGGCGCACAGCTATCAC     | GGCTCCATTTTCGACTCGC      |
| <i>Klf4</i>      | GTGCCCCGACTAACCCTTG      | GTCGTTGAACTCCTCGGTCT     |
| <i>Agr2</i>      | GGAGCCAAAAAGGACCCAAAG    | CTGTTGCTTGTCTTGATCTGT    |
| <i>Spink4</i>    | TGCCTGACCCGGATGAAAAC     | ATGGCTTGAGTGCACCTCTG     |
| <i>Pdia5</i>     | GACCCGCAATAACGTGCTG      | CTCGGTCATACTGCATGTGAAA   |
| <i>Zg16</i>      | CTCGGCCTCTGCTAATCCAT     | GCACCTGGAGACCTACTATGT    |
| <i>Muc2</i>      | GTCCGAAGTGTTACCCTGGA     | CCAGGAGTGGAGAAGGTCAG     |
| <i>TFF3</i>      | TTGCTGGGTCCTCTGGGATAG    | TACACTGCTCCGATGTGACAG    |
| <i>Spdef</i>     | GGACGGACGACTCTTCTGACAG   | GCTCCTGATGCTGCCTTCTCC    |
| <i>Cla1</i>      | CTGTCTTCTCTTGATCCTCCA    | CGTGGTCTATGGCGATGACG     |
| <i>Lact</i>      | CGTCTGCTTCCTATCAGGTTGAA  | GTGGGAAAATGTGTCCAGATACT  |
| <i>Apli</i>      | AACTCACCTCATGGCCTCTT     | GGGTTTCGGTTGGCATCATA     |
| <i>Sis</i>       | GCTATCGCTCTTGTGTGGTT     | TTCCAGGACTAGGGGTTGAAG    |
| <i>Chr-A</i>     | ATCCTCTCTATCCTGCGACAC    | GGGCTCTGGTTCTCAAACACT    |
| <i>Dcl1</i>      | TCCACCGGAATTGAACTCGG     | GGGAGCGAACAGTCTCAGA      |
| <i>Trpm5</i>     | CCAGCATAAGCGACAACATCT    | GAGCATAACAGTAGTTGGCCTG   |
| <i>Lyz1</i>      | GAGACCGAAGCACCGACTATG    | CGGTTTTGACATTGTGTTCGC    |
| <i>MMP7</i>      | CTGCCACTGTCCAGGAAG       | GGGAGAGTTTTCCAGTCATGG    |
| <i>Cryptdin1</i> | AAGAGACTAAAAGTGGAGCAGC   | CGACAGCAGAGCGTGTA        |
| <i>Cryptdin5</i> | AGGCTGATCCTATCCACAAAACAG | TGAAGAGCAGACCCTTCTTGCC   |
| <i>Defa24</i>    | CAAGAGGCTGCAAAGGAAGAGAAC | TGGTCTCCATGTTTCAGCGACAGC |
| <i>Wnt3</i>      | CTCGCTGGCTACCCAATTTG     | CTTACACCTTCTGCTACGCT     |
| <i>Wnt11</i>     | GCTGGCACTGTCCAAGACTC     | CTCCCGTGTACCTCTCTCCA     |
| <i>EGF</i>       | AGCATCTCTCGGATTGACCCA    | CCTGTCCCGTTAAGGAAAACCTCT |
| <i>Dll4</i>      | TTCCAGGCAACCTTCTCCGA     | ACTGCCGCTATTCTTGTC       |
| <i>Dll1</i>      | CAGGACCTTCTTTCGCGTATG    | AAGGGGAATCGGATGGGGTT     |
| <i>Lgr5</i>      | CGGGACCTTGAAGATTTCT      | GATTCGGATCAGCCAGCTAC     |
| <i>Olfm4</i>     | CGAGACTATCGGATTCGCTATG   | TTGTAGGCAGCCAGAGGGAG     |
| <i>Ascl2</i>     | TGCCGCACCAGAACTCGTAG     | ACTCCAGACGAGGTGGGCAT     |
| <i>Hes1</i>      | CCAGCCAGTGCAACACGA       | AATGCCGGGAGCTATCTTTCT    |
| <i>Sox9</i>      | GCCAGATGGACCCACCAGTAT    | TCCAAACAGGCAGGGAGATTC    |
| <i>Gapdh</i>     | CATGGCCTTCCGTGTTCTTA     | CCTGCTTACCACCTTCTTGAT    |
